# Supplementary material for: Pericyte-Specific Ninjurin1 Deletion Attenuates Vessel Maturation and Blood Flow Recovery in Hind Limb Ischemia
Source: PubMed Central journal article supplement — Arterioscler Thromb Vasc Biol. 2018 Aug 9;38(10):2358–70. doi: 10.1161/ATVBAHA.118.311375 (PMC6166707; doi:10.1161/atvbaha.118.311375), 2018-08-09
Supplement: atv-38-2358-s002.pdf [file atv-38-2358-s002.pdf]

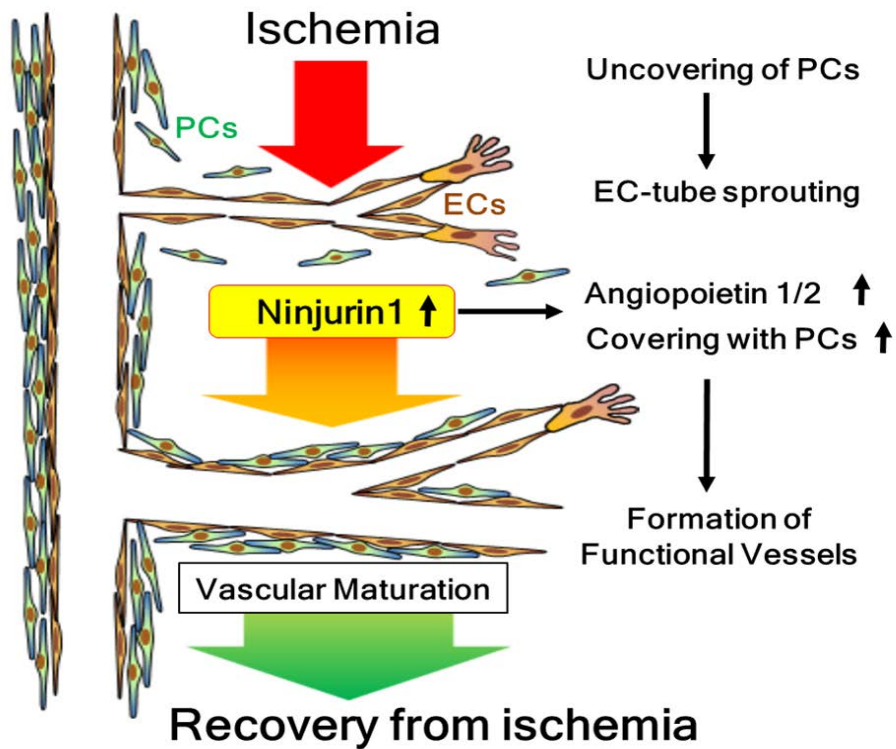

### The role of Ninjurin1 in angiogenesis within ischemic tissues.

For the initial step in angiogenesis, PCs are detached from existing vessel walls and the resultant window in the vascular walls allows endothelial cells (ECs) sprouting. Free detached PCs accelerated EC-growth through PCs trophic effects. In the later stage of angiogenesis, expression of Ninjurin1 in PCs is enhanced in response to ischemia. Ninjurin1 mediates the association between PCs and EC-sprouts to form functional mature vessels, resulting in blood flow recovery in ischemia.
